# Supplementary material for: Multifunctional polybenzoxazine nanocomposites containing photoresponsive azobenzene units, catalytic carboxylic acid groups, and pyrene units capable of dispersing carbon nanotubes
Source: Royal Society of Chemistry journal article supplement (doi:10.1039/c5ra07983g), 2015-01-01
Supplement: c5ra07983g1.pdf [file c5ra07983g1.pdf]

## Supporting Information for

# Multifunctional Polybenzoxazine Nanocomposites Containing Photoresponsive Azobenzene Units, Catalytic Carboxylic Acid Groups, and Pyrene Units Capable of Dispersing Carbon Nanotubes

Mohamed Gamal Mohamed,<sup>a</sup> Chi-Hui Hsiao,<sup>a</sup> Faliang Luo,<sup>b</sup> Lizong Dai<sup>c</sup> and Shiao-Wei

Kuo<sup>a,\*</sup>

<sup>a</sup>Department of Materials and Optoelectronic Science, Center for Functional Polymers and Supramolecular Materials, National Sun Yat-Sen University, Kaohsiung, Taiwan

<sup>b</sup>Key Laboratory of Energy Resources & Chemical Engineering, Ningxia University, Ministry-Province Co-cultivated State Key Laboratory Base of Natural Gas Conversion, Yinchuan 750021, China

<sup>c</sup>Department of Material Science and Engineering, Fujian Provincial Key Laboratory of Fire Retardant Materials, College of Materials, Xiamen University, Xiamen, Fujian, 361005, China

\*To whom correspondence should be addressed

E-mail: [kuosw@faculty.nsysu.edu.tw](mailto:kuosw@faculty.nsysu.edu.tw)

TEL./FAX: 886-7-5254099

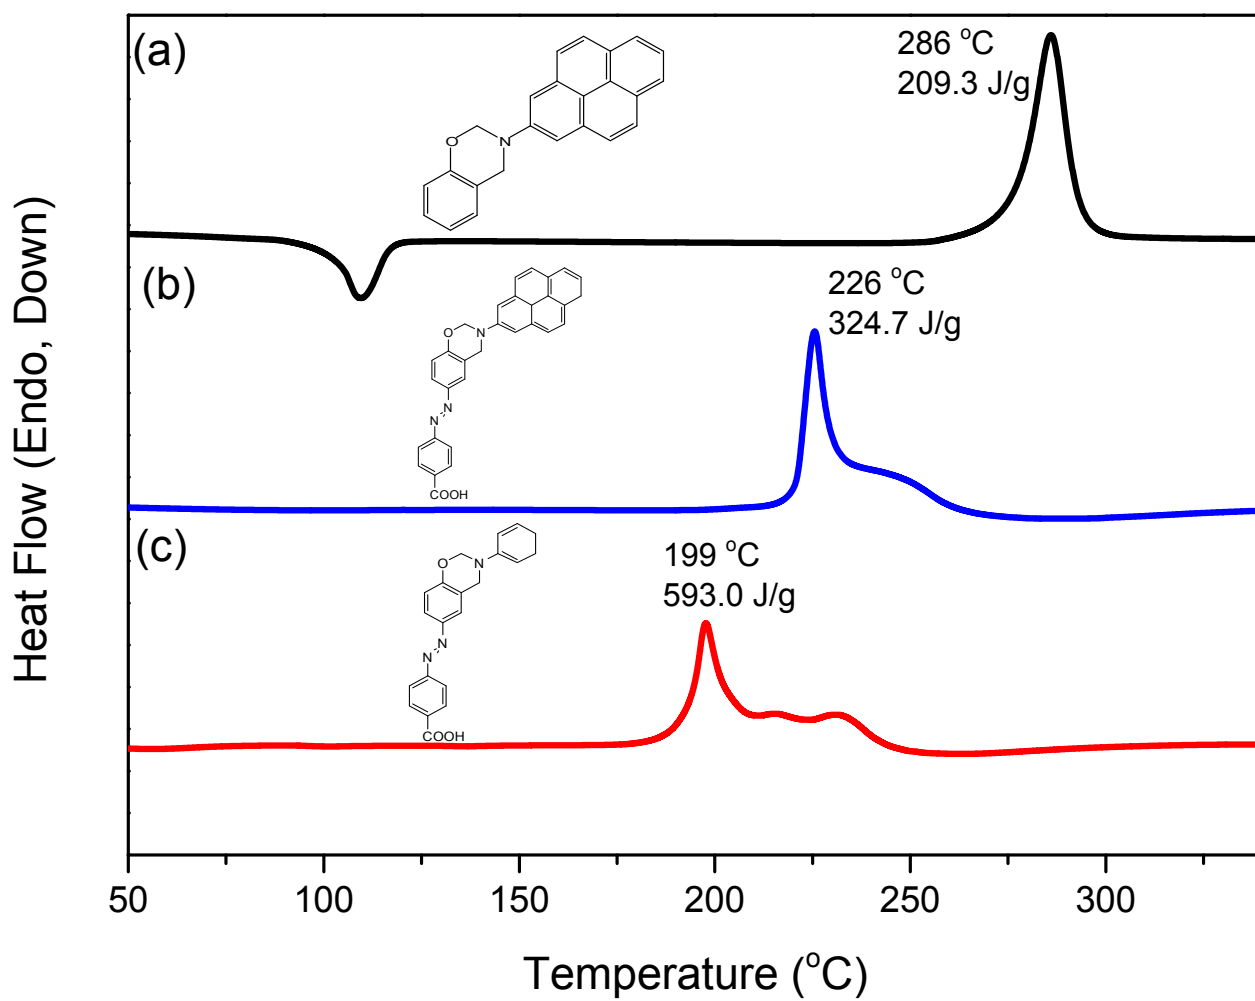

Figure S1: DSC thermograms of the curing behavior of (a) Py-BZ, (b) Azo-COOH-Py BZ, and (c) Azo-COOH BZ.

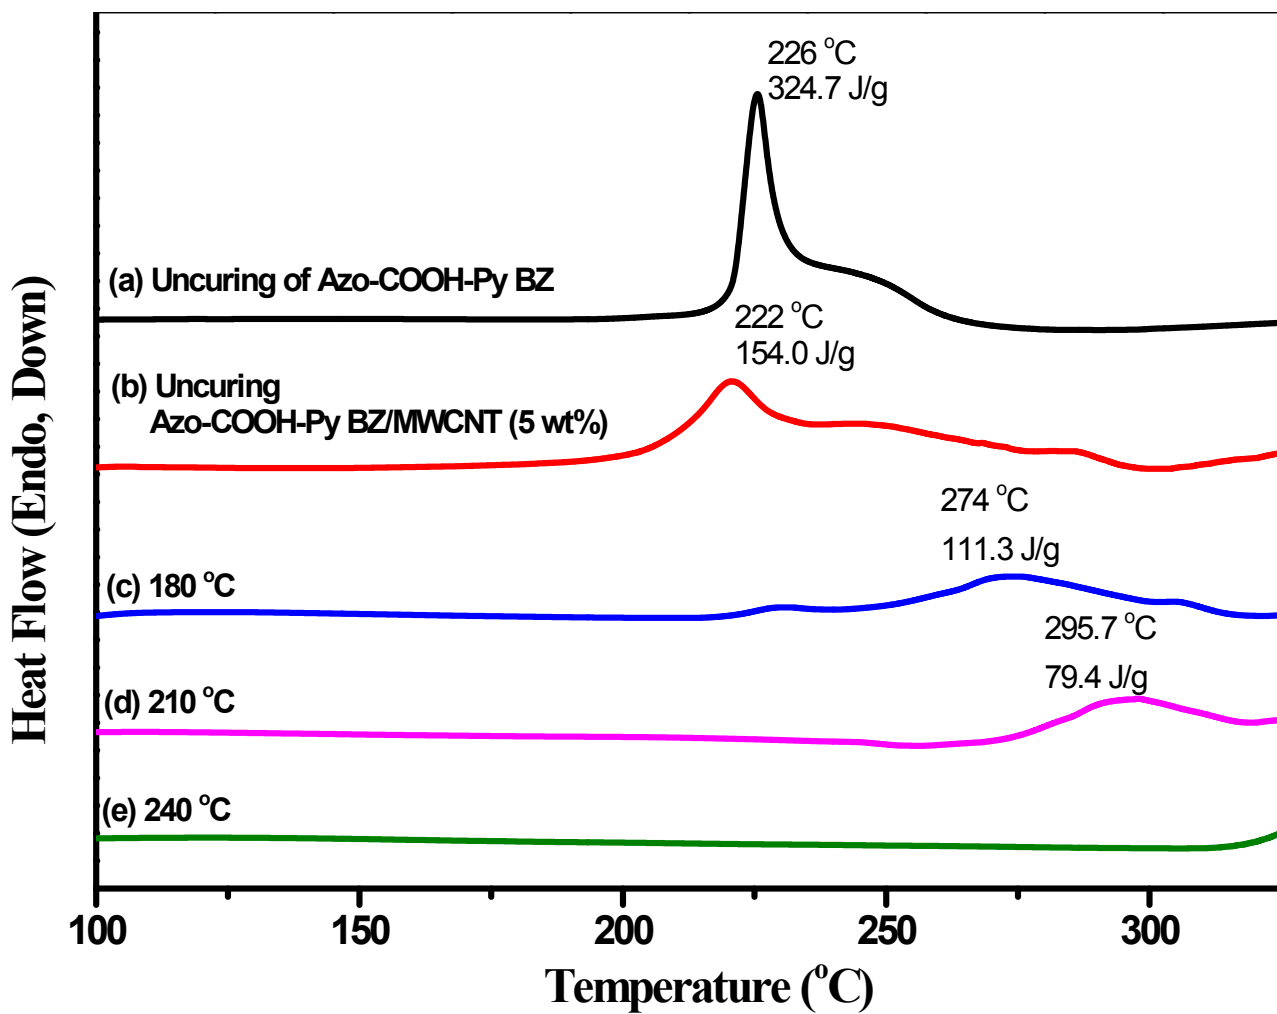

Figure S2: DSC thermograms of the curing behavior of the Azo-COOH-Py BZ/MWCNT (5 wt%) hybrid complex after each curing stage.
